# Supplementary material for: Microbial redox interplay enhances biodiversity and ecosystem productivity
Source: Research Square preprint supplement (doi:10.21203/rs.3.rs-959776/v1), 2021-10-19
Supplement: Supplementary file 1 [file 0a60b27b1af9a5c6288134cd.docx]

**Extended Data Table 1 | Half reactions and overall cell reactions with a half reaction as a reduction reaction and the standard hydrogen electrode as an oxidation reaction. *NA* = 3, *NB* = 2, and *NC* = 2**

| Half reaction | Overall cell reaction with the standard hydrogen electrode as an oxidation or reduction reaction | Standard Gibbs energy change of the overall cell reaction, ∆rGºH | Standard reduction potential, *ER*º |
| --- | --- | --- | --- |
| (a) A1 + e− ⇌ A2 | A1 + H2 ⇌ A2 + H+ |  |  |
| (b) A2 + e− ⇌ A3 | A2 + H2 ⇌ A3 + H+ |  |  |
| (c) A1 + 2e− ⇌ A3 | A1 + H2 ⇌ A3 + 2H+ |  |  |
| (d) B1 + e− ⇌ B2 | B1 + H2 ⇌ B2 + H+ |  |  |
| (e) C1 + e− ⇌ C2 | C1 + H2 ⇌ C2 + H+ |  |  |

**Extended Data Table 2 | Possible redox reactions when (*NA*, *NB*, *Nc*) = (3, 2, 2)**

| Reaction number,.*i* | Forward reaction | | | Standard Gibbs energy change of reaction when 1 mol of a compound in the first term of the left hand side of reaction reacts, ∆rG*i*º |
| --- | --- | --- | --- | --- |
| 1  2  3  4  5  6  7  8 | A1 + A3  A2 + B1  A2 + C1  A3 + 2B1  A3 + 2C1  A3 + B1  A3 + C1  B2 + C1 | →  →  →  →  →  →  →  → | 2A2  A1 + B2  A1 + C2  A1 + 2B2  A1 + 2C2  A2 + B2  A2 + C2  B1 + C2 | −147.90  −23.61  −189.76  −195.12  −527.42  −171.51  −337.67  −166.15 |
|  | Backward reaction | | |  |
| 9  10  11  12  13  14  15  16 | A2  A1 + B2  A1 + C2  A1 + 2B2  A1 + 2C2  A2 + B2  A2 + C2  B1 + C2 | →  →  →  →  →  →  →  → | 0.5A1 + 0.5A3  A2 + B1  A2 + C1  A3 + 2B1  A3 + 2C1  A3 + B1  A3 + C1  B2 + C1 | 73.95  23.61  189.76  195.12  527.42  171.51  337.66  166.15 |

The standard Gibbs energy change of reactions were calculated by setting ∆*fG*A1º = 9.71, ∆*fG*A2º = 135.47, ∆*fG*A3º = 409.13, ∆*fG*B1º = 53.1, ∆*fG*B2º = 155.25, ∆*fG*C1º = 70.33, and ∆*fG*C2º = 6.33

**Extended Data Table 3 | The total number of possible redox reactions at a given (*NA*, *NB*, *Nc*) condition**

| Number of compounds of each element  (*NA*, *NB*, *Nc*) | Total number of compounds  *Ntot* | Total number of possible redox reactions  *Nreac* |
| --- | --- | --- |
| (2, 2, 0)  (3, 2, 0)  (4, 2, 0)  (5, 2, 0)  (2, 2, 2)  (3, 2, 2)  (3, 3, 2)  (3, 3, 3)  (4, 3, 3)  (4, 4, 3)  (4, 4, 4) | 4  5  6  7  6  7  8  9  10  11  12 | 2  8  24  64  6  16  34  60  106  170  252 |

**Extended Data Table 4 | Symbols, definition, units, values of the initial conditions, and default values or ranges of the parameters**

| Symbols | Definition | Units | Initial condition / Default values or ranges |
| --- | --- | --- | --- |
| *Mi*  *Xj*  *NX*  *Ntot*  *Nreac*  Δ*fGXj*º  Δ*rGi*º  *qi*  *ci*  *ri*  *KXij*  *R*  *T*  *mi*  *IXj*  *DXj*  *Xtot*  *ki* | Biomass of the *i*th functional group  Molar concentration of the *j*th compound of an element X (X = A, B, C)  Number of compounds of an element X  Total number of possible redox compounds  Total number of reactions  Standard Gibbs energy change of formation of X*j*  Standard Gibbs energy change of the *i*th reaction  Biomass yield of the *i*th functional group for a given energy gain from ATP (in units of kJ)  Fraction of energy of the *i*th functional group that can be used for ATP synthesis  Maximum catalytic rate of the *i*th functional group  The half saturation constant for a compound X*j* of the *i*th functional group  Gas constant  Absolute temperature  Maintenance energy of the *i*th functional group  Inflow rate of compound X*j*  Outflow rate constant of compound X*j*  Availability of compounds  Abiotic reaction rate constant of the *i*th reaction | mg L−1  mol L−1  −  −  −  kJ mol−1  kJ mol−1  mg kJ−1  −  mol L−1 mgC−1 time−1  mol L−1  kJ K−1 mol−1  K  kJ mgC−1 h−1  mol L−1 h−1  h−1  mol L−1  h−1 or L mol−1 h−1 | 10−6  10−4  2, 3, 4, 5  *NA* + *NB* + *NC*  See Table S1.6  (0, 500]  0.1  0.5  [10−3, 1]  10−4  8.31 × 10−3  288.15  0.3  *Xtot*/ *Ntot*  0.01  *Ntot* *IXj* / *DXj*  [10−6, 10−4] for forward reactions |
