# Supplementary material for: Microbial redox interplay enhances biodiversity and ecosystem productivity
Source: Research Square preprint supplement (doi:10.21203/rs.3.rs-959776/v1), 2021-10-19
Supplement: Supplementary file 2 [file 62a2fef54b16745eb1d390ba.docx]

**SI Guide**

- **Supplemental_Info.docx**

This file contains Supplementary methods, discussion and references.

- **Extended_Data_Tables.docx**

This file summarises Extended Data Tables 1 – 4.

- **Extended_Data_Figures.pdf**

This file summarises Extended Data Figures 1 – 5.

- **Programs (folder)**
- **FigS1 (folder)**
  - **Data (folder)**
    - **comppar.csv**

This file summarises the information related to compound *Xj* (see Supplemental Information section S.3.3).

- - - **eqs.csv**

This file contains the differential equations in the Wolfram Language code.

- - - **reacmicrobpar.csv**

This file summarises the information related to the *i*th species and reaction (see Supplemental Information section S.3.3).

- - **FigS1.nb**

This file is a program written in the Wolfram Language. The code generates Extended Data Figure 1a.

- **Functions.nb**

This file is a program written in the Wolfram Language, summarising module functions called from Simulation.nb (see Supplemental Information section S.3.2).

- **Run.nb**

This file is a program written in the Wolfram Language, acting as an executable file (see Supplemental Information section S.3.2).

- **Simulation.nb**

This file is a program written in the Wolfram Language, automatically generating simultaneous differential equations and performing numerical differentiation (see Supplemental Information section S.3.2).
